# Supplementary material
Source: PubMed Central journal article supplement (PMC9630511)
Supplement: 41598_2022_20649_MOESM1_ESM.pdf [file 41598_2022_20649_MOESM1_ESM.pdf]

# Effects of Walking and Crowding - BRMS MODELS

This analysis document is accompanying the journal article “Effects of walking and crowding on the subjective experience of indoor and outdoor urban environments: a controlled, mobile neurophysiological study” by Mavros, Waelti, Nazemi, Ong and Hoelscher.

The file includes the statistical analysis, both code and results, and it allows to reproduce the (bayesian) statistical models presented in the paper.

## Analysis Plan

In the present document we show the descriptive plots (histograms of the data), the code used to fit the models using the R-package *brms*, the posterior predictive checks of the resulting model (*pp\_check*), and the model results. These were not included in the main manuscript for brevity, but can be useful to assess the models. Model estimates are printed using the *bayestestR* package, which provides descriptive statistics if the estimated parameters (Median, 95% Credible Intervals) and model diagnostics (Rhat and ESS) and probability direction (*pd*, i.e. the proportion of the posterior estimate that is in the same direction as the median of estimate, and thus the strength of evidence for the presence or absence of an effect).

For all these dependent variables we fit a mixed-effects (hierarchical) model, specifying a random effect for *participant* and for counterbalancing *schedule*, and fixed effects for *condition* (i.e. the stimuli) and for *group* (standing or walking). We fit Bayesian mixed-effects (hierarchical) models using *brms* to the following dependent measures:

1. Self-reported Valence (measured using the self-assessment manikin, or SAM)
2. Self-reported Arousal (also measured with SAM)
3. Frontal midline theta (EEG)
4. Frontal alpha assymetry (EEG)
5. Theta / beta ratio (EEG)
6. Frontal alpha (EEG)
7. Skin conductance levels
8. Skin conductance responses

## SETUP

### Self\_Reported Data

#### Load data

We have self-reported from all participants (N = 42), so in total (42 \* 6) data-points.

```
stats_behavioural_table <- read_csv("_data/self_reported_data.csv")
head(stats_behavioural_table)
```

| Condition<br><chr> | Participant_ID<br><dbl> | Group<br><chr> | Arousal<br><dbl> | Valence<br><dbl> | Schedule<br><chr>   | LikingCrowds<br><dbl> |
|--------------------|-------------------------|----------------|------------------|------------------|---------------------|-----------------------|
| G1                 | 1041                    | Standing       | 8                | 2                | First stimulus = G1 | 2                     |
| IC                 | 1041                    | Standing       | 3                | 7                | First stimulus = G1 | 2                     |
| OE                 | 1041                    | Standing       | 5                | 4                | First stimulus = G1 | 2                     |
| G2                 | 1041                    | Standing       | 8                | 1                | First stimulus = G1 | 2                     |
| OC                 | 1041                    | Standing       | 3                | 7                | First stimulus = G1 | 2                     |
| IE                 | 1041                    | Standing       | 8                | 7                | First stimulus = G1 | 2                     |

6 rows

```
v <- stats_behavioural_table %>%
  ggplot(aes(Valence)) +
  geom_histogram(outline.type = "upper") +
  facet_wrap(~Condition) +
  labs(title = "Valence") +
  scale_x_continuous(limits = c(1,9))

a <- stats_behavioural_table %>%
  ggplot(aes(Arousal)) +
  geom_histogram(outline.type = "upper") +
  facet_wrap(~Condition) +
  labs(title = "Arousal") +
  scale_x_continuous(limits = c(1,9))

v + a
```

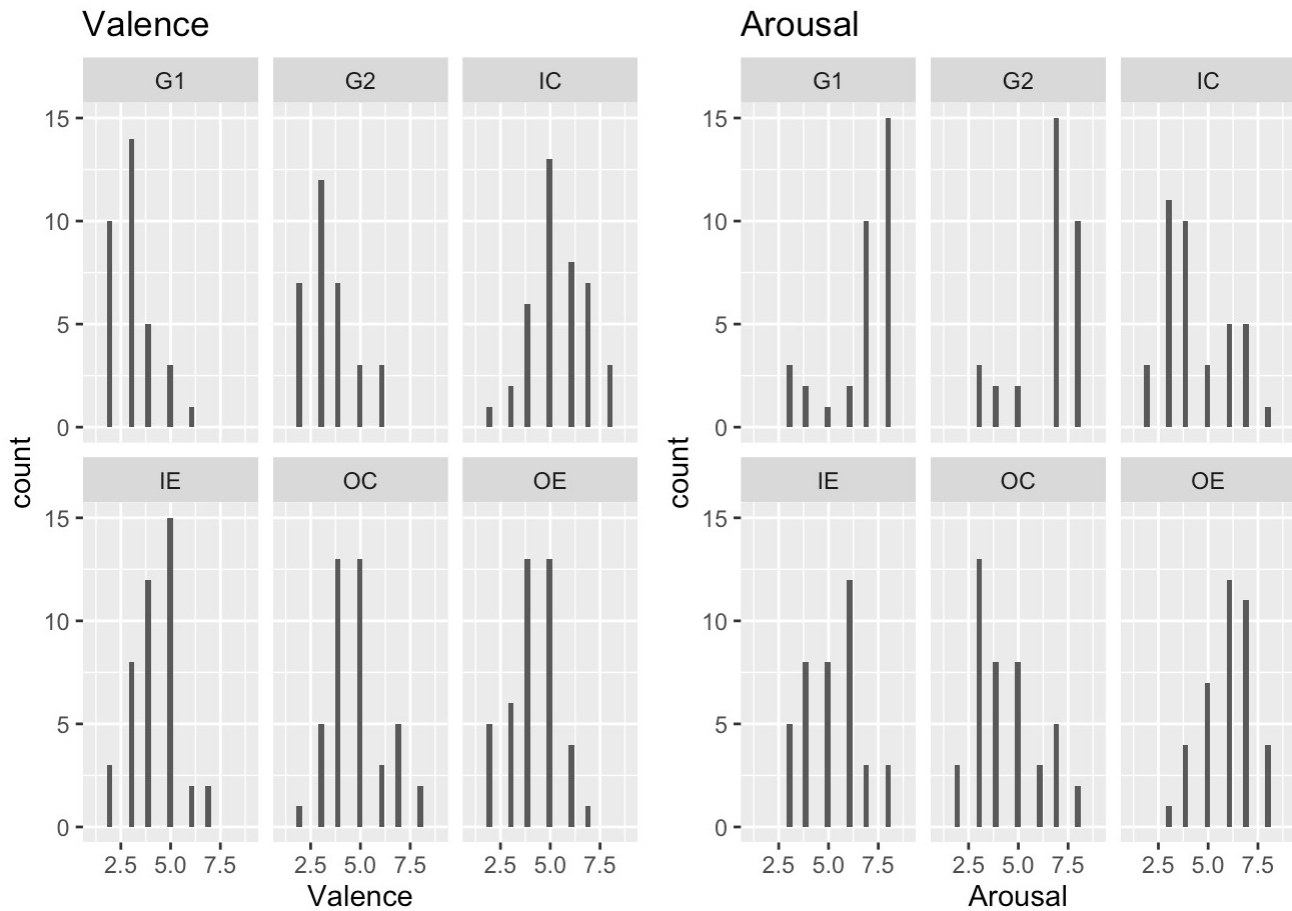

# 1 Valence

```

bf_sam_valence <- brm(formula = bf(Valence ~ Group * Condition + (1 + Condition | Participant_ID) + (1|Schedule)),
                      stats_behavioural_table,
                      family = cumulative(),
                      iter = 4000,
                      seed = 4343,
                      prior = set_prior("normal(0, 10)", class = "b"),
                      save_pars = save_pars(all = T),
                      file = here::here("_brmsfiles/bf_sam_valence"),
                      cores = parallel::detectCores(),
                      control = list(adapt_delta = .999, max_treedepth = 15)
)

pp_check(bf_sam_valence, type = "bars")

```

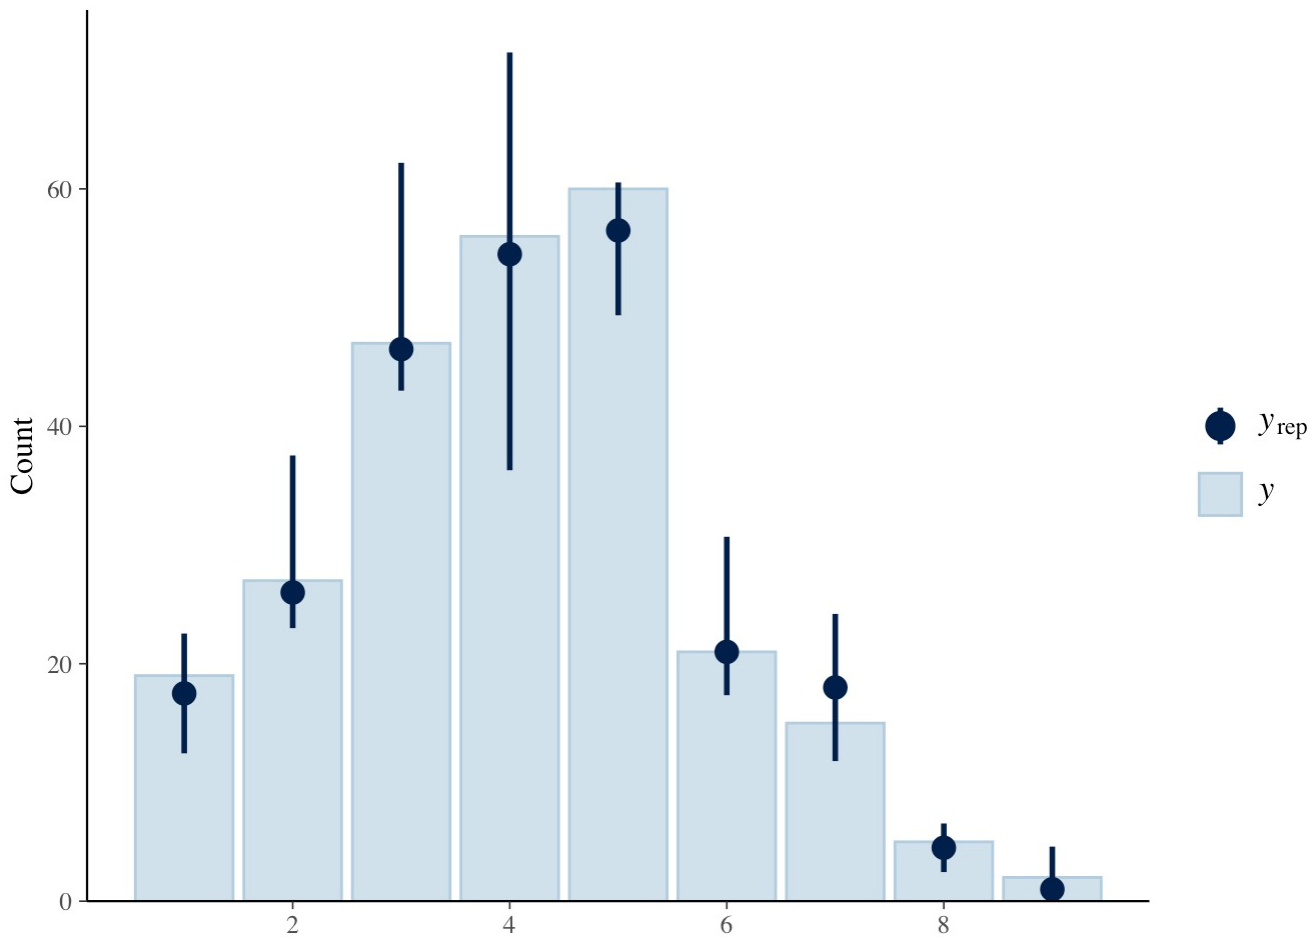

```
describe_posterior(bf_sam_valence, test = "pd")
```

| Parameter<br><chr> | Median<br><dbl> | CI<br><dbl> | CI_low<br><dbl> | CI_high<br><dbl> | pd<br><dbl> | Rf<br><dbl> |
|--------------------|-----------------|-------------|-----------------|------------------|-------------|-------------|
| 12 b_Intercept[1]  | -3.27913048     | 0.95        | -6.2139347      | -1.012269        | 0.998125    | 1.0017      |
| 13 b_Intercept[2]  | -0.99412051     | 0.95        | -3.8324343      | 1.091305         | 0.830375    | 1.0007      |
| 14 b_Intercept[3]  | 1.36588687      | 0.95        | -1.3848743      | 3.642560         | 0.851500    | 1.0012      |
| 15 b_Intercept[4]  | 3.58701991      | 0.95        | 0.7565055       | 6.143204         | 0.991875    | 1.0032      |
| 16 b_Intercept[5]  | 6.15706393      | 0.95        | 3.0332943       | 9.068959         | 0.999750    | 1.0059      |
| 17 b_Intercept[6]  | 7.67810898      | 0.95        | 4.5202248       | 11.065048        | 1.000000    | 1.0075      |
| 18 b_Intercept[7]  | 9.97257337      | 0.95        | 6.3435732       | 14.073116        | 1.000000    | 1.0086      |
| 19 b_Intercept[8]  | 12.18343516     | 0.95        | 7.9178613       | 17.159883        | 1.000000    | 1.0079      |
| 6 b_GroupWalking   | -0.09263437     | 0.95        | -1.8071998      | 1.705332         | 0.541000    | 1.0038      |
| 1 b_ConditionG2    | -0.31857934     | 0.95        | -2.0160170      | 1.367381         | 0.649625    | 1.0003      |

1-10 of 19 rows

[Previous](#) **1** [2](#) [Next](#)

## 2 Arousal

```
bf_sam_arousal <- brm(formula = bf(Arousal ~ Group * Condition + (1 + Condition | Participant_ID) + (1|Schedule)),
  stats_behavioural_table,
  family = cumulative(),
  iter = 4000,
  seed = 4343,
  prior = set_prior("normal(0, 5)", class = "b"),
  save_pars = save_pars(all = T),
  file = here::here("_brmsfiles/bf_sam_arousal"),
  cores = parallel::detectCores(),
  control = list(adapt_delta = .999, max_treedepth = 15)
)

pp_check(bf_sam_arousal, type = "bars")
```

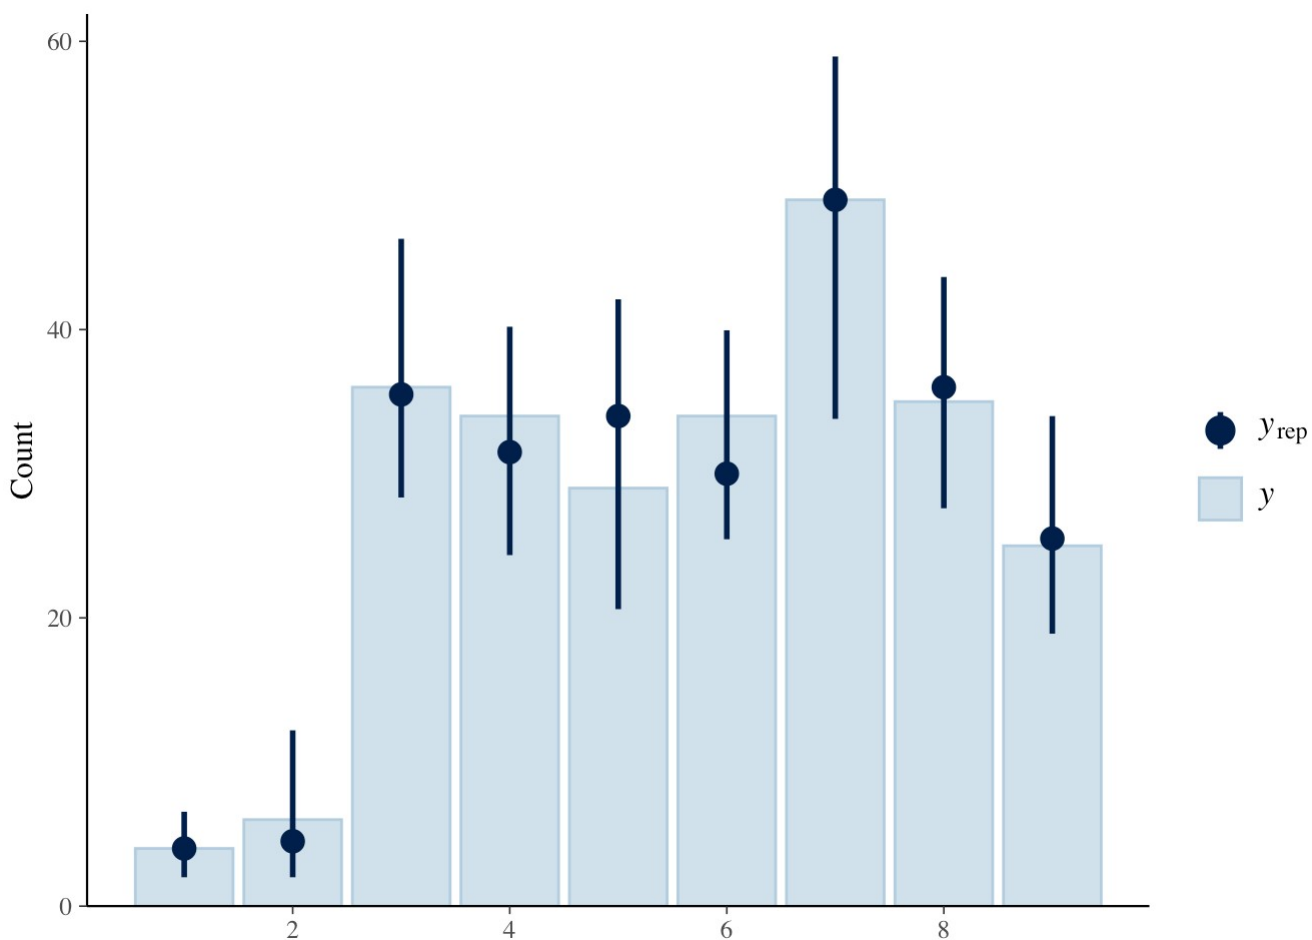

```
describe_posterior(bf_sam_arousal, test = "pd")
```

| Parameter<br><chr> | Median<br><dbl> | CI<br><dbl> | CI_low<br><dbl> | CI_high<br><dbl> | pd<br><dbl>   |
|--------------------|-----------------|-------------|-----------------|------------------|---------------|
| 12 b_Intercept[1]  | -11.3957664     | 0.95        | -14.9713141     | -8.1489982       | 1.000000 1.00 |

| Parameter<br><chr> | Median<br><dbl> | CI<br><dbl> | CI_low<br><dbl> | CI_high<br><dbl> | pd<br><dbl> |      |
|--------------------|-----------------|-------------|-----------------|------------------|-------------|------|
| 13 b_Intercept[2]  | -9.5060458      | 0.95        | -12.7462519     | -6.6438302       | 1.000000    | 1.00 |
| 14 b_Intercept[3]  | -6.0462081      | 0.95        | -8.7310409      | -3.6582738       | 1.000000    | 1.00 |
| 15 b_Intercept[4]  | -4.2511971      | 0.95        | -6.5264767      | -1.7147265       | 0.998625    | 1.00 |
| 16 b_Intercept[5]  | -2.8577342      | 0.95        | -4.9285544      | -0.3268421       | 0.982875    | 1.00 |
| 17 b_Intercept[6]  | -1.3202732      | 0.95        | -3.5008791      | 1.0590898        | 0.865500    | 1.00 |
| 18 b_Intercept[7]  | 1.0205147       | 0.95        | -1.0287852      | 3.4846205        | 0.841375    | 1.00 |
| 19 b_Intercept[8]  | 3.4883818       | 0.95        | 1.3094895       | 6.1055472        | 0.999500    | 1.00 |
| 6 b_GroupWalking   | 1.3471508       | 0.95        | -0.8039706      | 3.3195924        | 0.892625    | 1.00 |
| 1 b_ConditionG2    | 0.4027134       | 0.95        | -1.0835691      | 1.8377843        | 0.710000    | 1.00 |

1-10 of 19 rows

Previous **1** 2 Next

# EEG DATA

## Load data

```
eeg_markers_segments_60s <- readr::read_rds("_data/original_segment4_60s.rds")
eeg_markers_segments_60s %>%
  head()
```

| Group<br><fct> | Condition<br><fct> | Participant_ID<br><chr> | Segm...<br><dbl> | TBR<br><dbl> | FAA<br><dbl> | FMT<br><dbl> |
|----------------|--------------------|-------------------------|------------------|--------------|--------------|--------------|
| Standing       | Green_1            | 1041                    | 4                | 1.4680312    | -0.14437121  | 118.22645    |
| Standing       | Green_2            | 1041                    | 4                | 1.4803180    | 0.10489069   | 91.52706     |
| Standing       | Indoor_Crowded     | 1041                    | 4                | 1.7005612    | -0.04945622  | 116.57264    |
| Standing       | Indoor_Uncrowded   | 1041                    | 4                | 1.0960640    | -0.02302966  | 106.88314    |
| Standing       | Outdoor_Crowded    | 1041                    | 4                | 0.9219474    | -0.09625504  | 90.28144     |
| Standing       | Outdoor_Uncrowded  | 1041                    | 4                | 0.7098122    | -0.15188811  | 105.82250    |

6 rows | 1-9 of 21 columns

Every participant has 6 rows, corresponding to the 6 video-stimuli.

```
table(eeg_markers_segments_60s$Participant_ID)
```

```
##
## 1041 1164 1302 1370 1755 1874 2405 2785 2894 3111 3289 4216 4308 4754 4900 5099
##      6      6      6      6      6      6      6      6      6      6      6      6      6      6      6      6
## 5515 5541 5668 5748 5800 5932 6043 6373 6461 6803 6810 7338 7430 7793 8551 8806
##      6      6      6      6      6      6      6      6      6      6      6      6      6      6      6      6
## 8966 9032 9948
##      6      6      6
```

There are EEG data for 35 participants. Sanity check:

```
length(eeg_markers_segments_60s$Participant_ID) / 6
```

```
## [1] 35
```

### 3 FMT (Frontal Midline Theta)

```
hist(scale(eeg_markers_segments_60s$FMT))
```

**Histogram of scale(eeg\_markers\_segments\_60s\$FMT)**

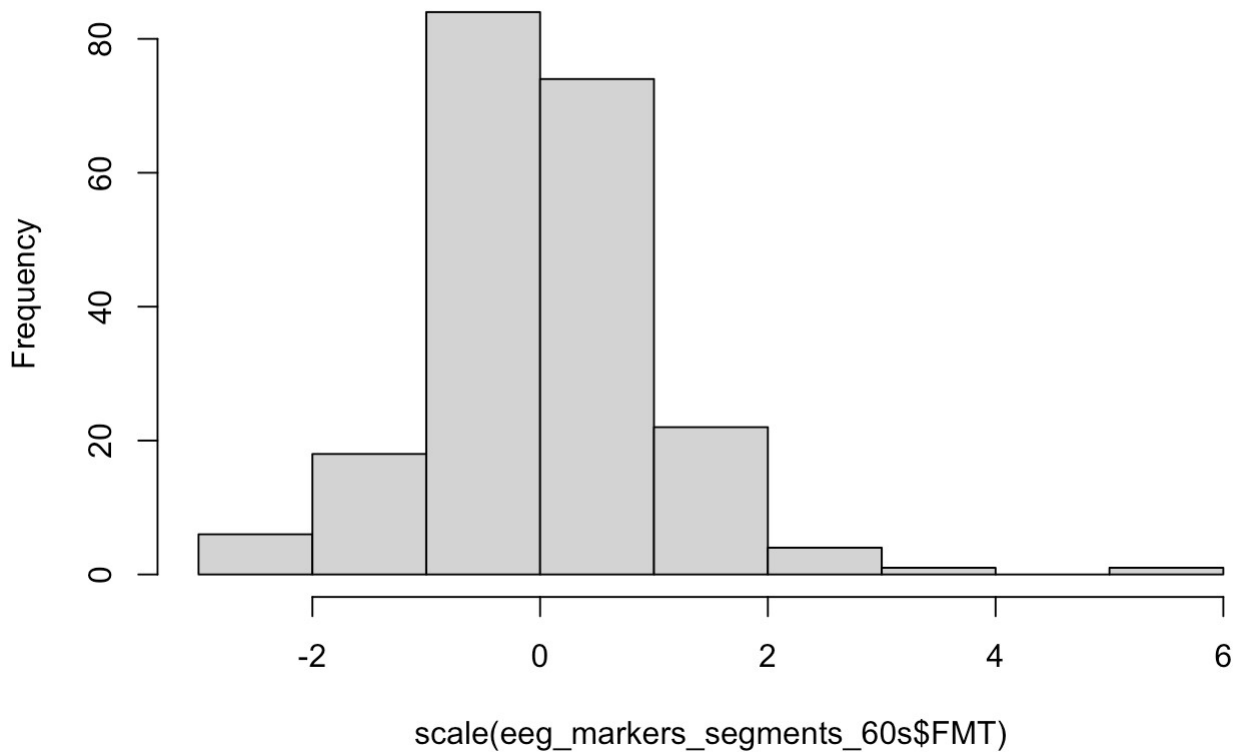

We see that there are `nrow(eeg_markers_segments_60s) - nrow(eeg_markers_segments_60s %>% mutate(FMT_s = scale(FMT)) %>% filter(FMT_s > -4 & FMT_s < 4))` observations, that are more than 4 standard deviations from the mean. We treat this as an outlier and remove it from the analysis.

```

bf_fmt_int_student_60s <- brm(formula = bf(FMT ~ Group*Condition + (1 + Condition | Pa
rticipant_ID) + (1|schedule), sigma~Group),
  eeg_markers_segments_60s %>%
  mutate(FMT_s = scale(FMT)) %>%
  filter(FMT_s > -4 & FMT_s < 4), # remove one outliers
  family = student(),
  iter = 4000,
  seed = 4343,
  prior = set_prior("normal(0, 5)"),
  save_pars = save_pars(all = T),
  file = here::here("_brmsfiles/bf_fmt_int_student_60s"),
  cores = parallel::detectCores(),
  control = list(adapt_delta = .999)
)

pp_check(bf_fmt_int_student_60s)

```

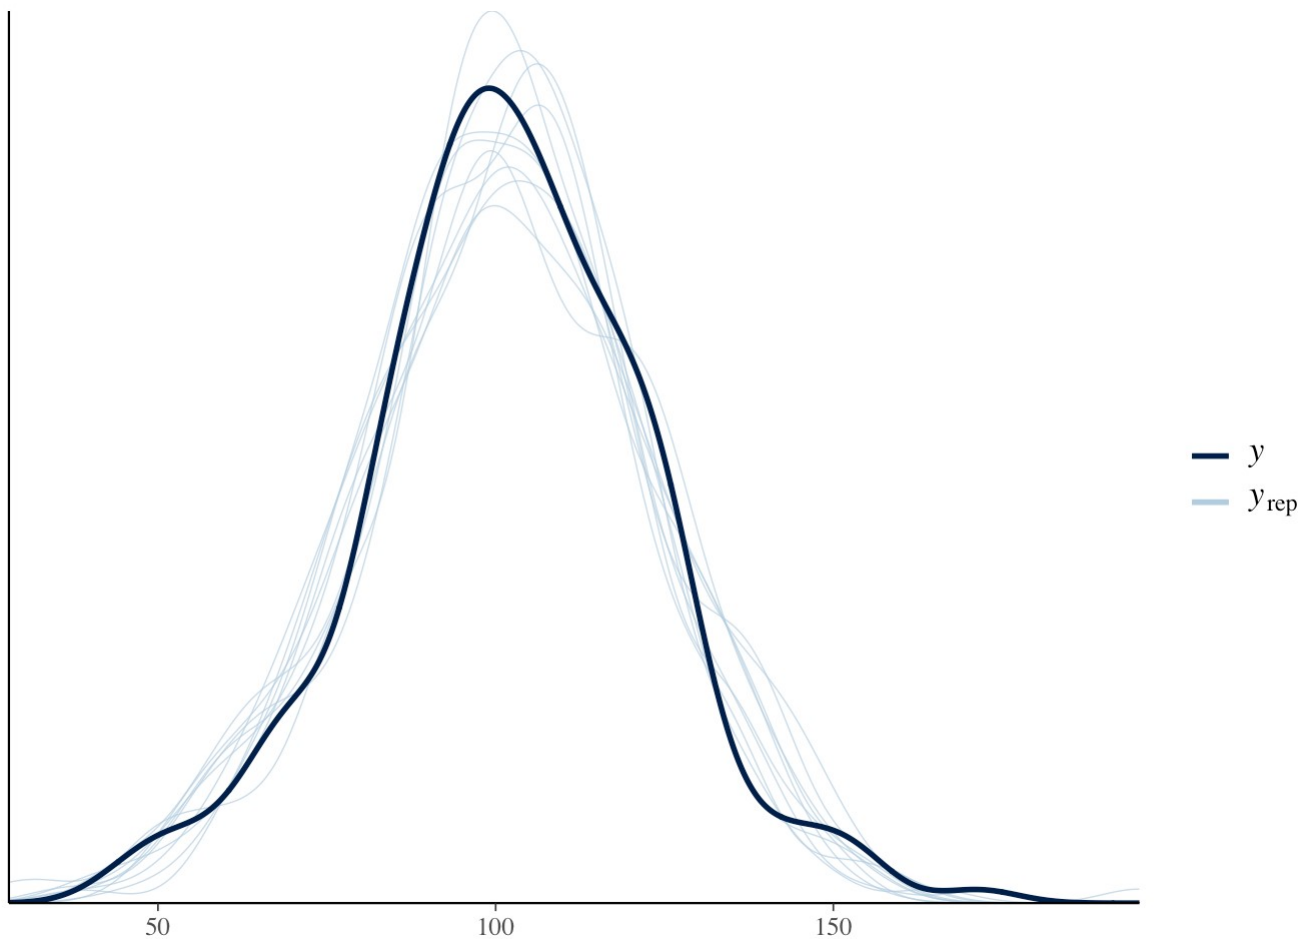

```
describe_posterior(bf_fmt_int_student_60s, test = "pd")
```

| Parameter<br><chr> | Median<br><dbl> | CI<br><dbl> | CI_low<br><dbl> | CI_high<br><dbl> |
|--------------------|-----------------|-------------|-----------------|------------------|
| 12 b_Intercept     | 102.50660561    | 0.95        | 85.5599181      | 118.0            |



| Parameter<br><chr>                        | Median<br><dbl> | CI<br><dbl> | CI_low<br><dbl> |     |
|-------------------------------------------|-----------------|-------------|-----------------|-----|
| 14 b_sigma_Intercept                      | 2.42327430      | 0.95        | 2.1589851       | 2.6 |
| 6 b_GroupStanding                         | -1.26289683     | 0.95        | -8.7429459      | 6.1 |
| 1 b_ConditionGreen_2                      | -1.48694594     | 0.95        | -6.8491225      | 3.8 |
| 2 b_ConditionIndoor_Crowded               | 1.46979101      | 0.95        | -4.0010190      | 6.9 |
| 3 b_ConditionIndoor_Uncrowded             | -1.29746159     | 0.95        | -6.3405907      | 4.5 |
| 4 b_ConditionOutdoor_Crowded              | 2.95181101      | 0.95        | -2.6344891      | 8.2 |
| 5 b_ConditionOutdoor_Uncrowded            | 1.24655655      | 0.95        | -4.2254586      | 6.2 |
| 7 b_GroupStanding:ConditionGreen_2        | -3.00027911     | 0.95        | -9.2713284      | 3.9 |
| 8 b_GroupStanding:ConditionIndoor_Crowded | 0.38820635      | 0.95        | -6.4780861      | 6.7 |

1-10 of 14 rows | 1-7 of 9 columns

Previous **1** 2 Next

## 4 Frontal Alpha

```
# check for severe outliers
# looks ok
hist(scale(eeg_markers_segments_60s$Alpha_Frontal))
```

## Histogram of scale(eeg\_markers\_segments\_60s\$Alpha\_Frontal)

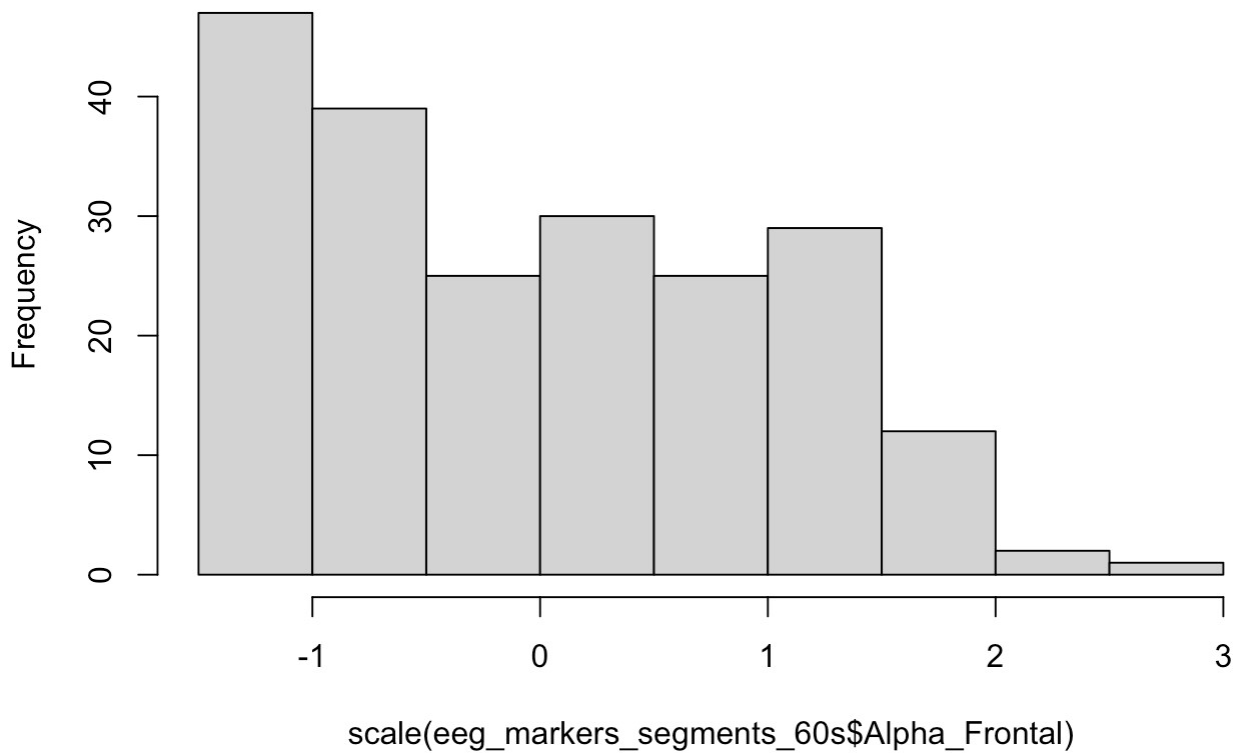

```
eeg_markers_segments_60s %>%  
  ggplot(aes(Alpha_Frontal)) +  
  geom_density(outline.type = "upper") +  
  facet_wrap(~Group*Condition)
```

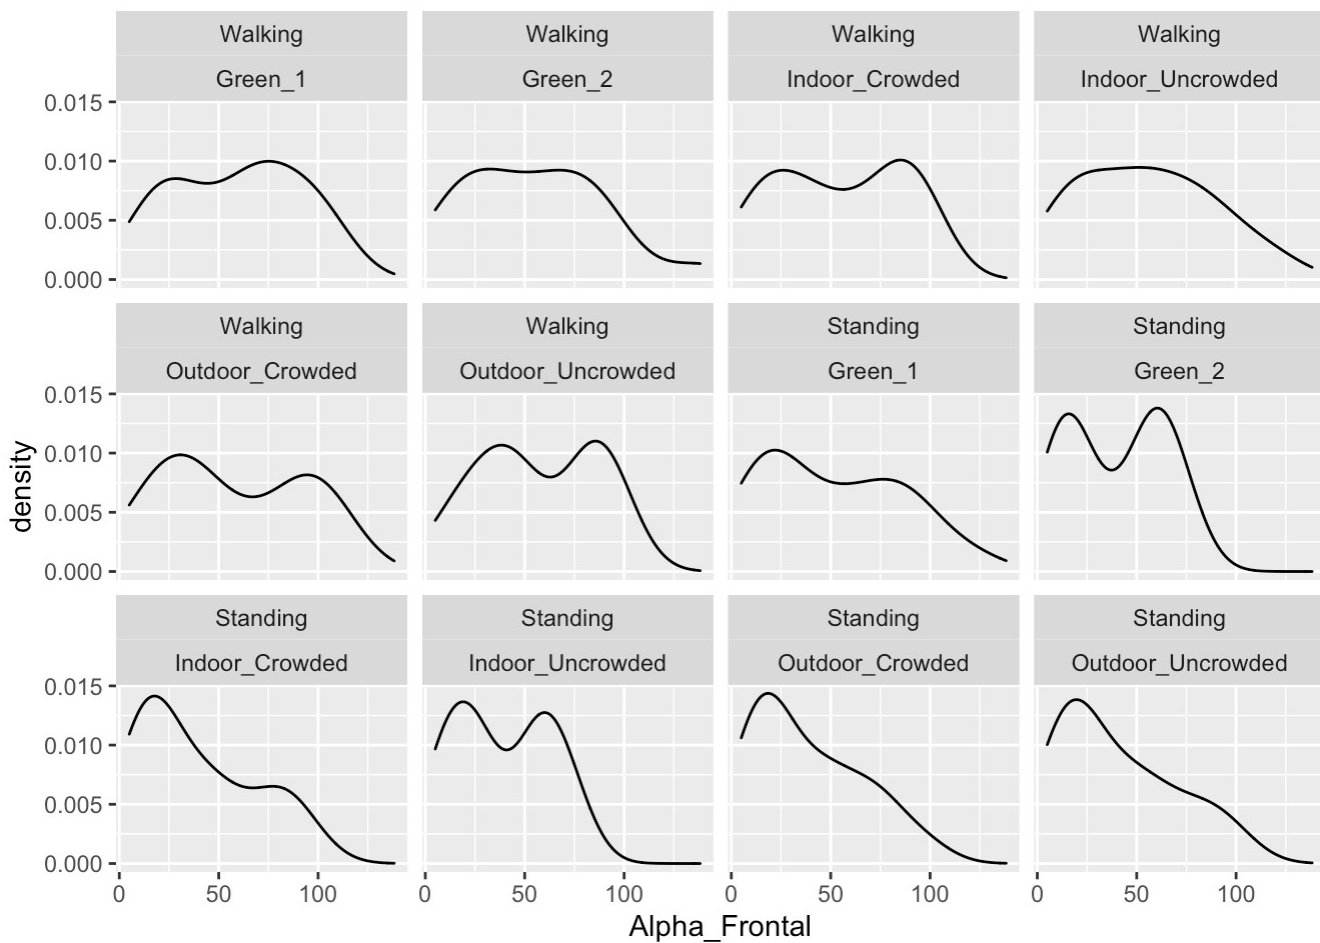

```

bf_alphaFrontal_int_exgaussian_60s <- brm(formula = bf(Alpha_Frontal ~ Group * Condit
ion + (1 + Condition | Participant_ID) + (1|schedule), sigma ~ Group),
      eeg_markers_segments_60s, #
      family = exgaussian(),
      iter = 4000,
      seed = 4343,
      cores = parallel::detectCores(),
      prior = set_prior("normal(0,5)"),
      save_pars = save_pars(all = T),
      file = here::here("_brmsfiles/bf_alphaFrontal_int_exgaussia
n_60s_n0-5")
)

pp_check(bf_alphaFrontal_int_exgaussian_60s)

```

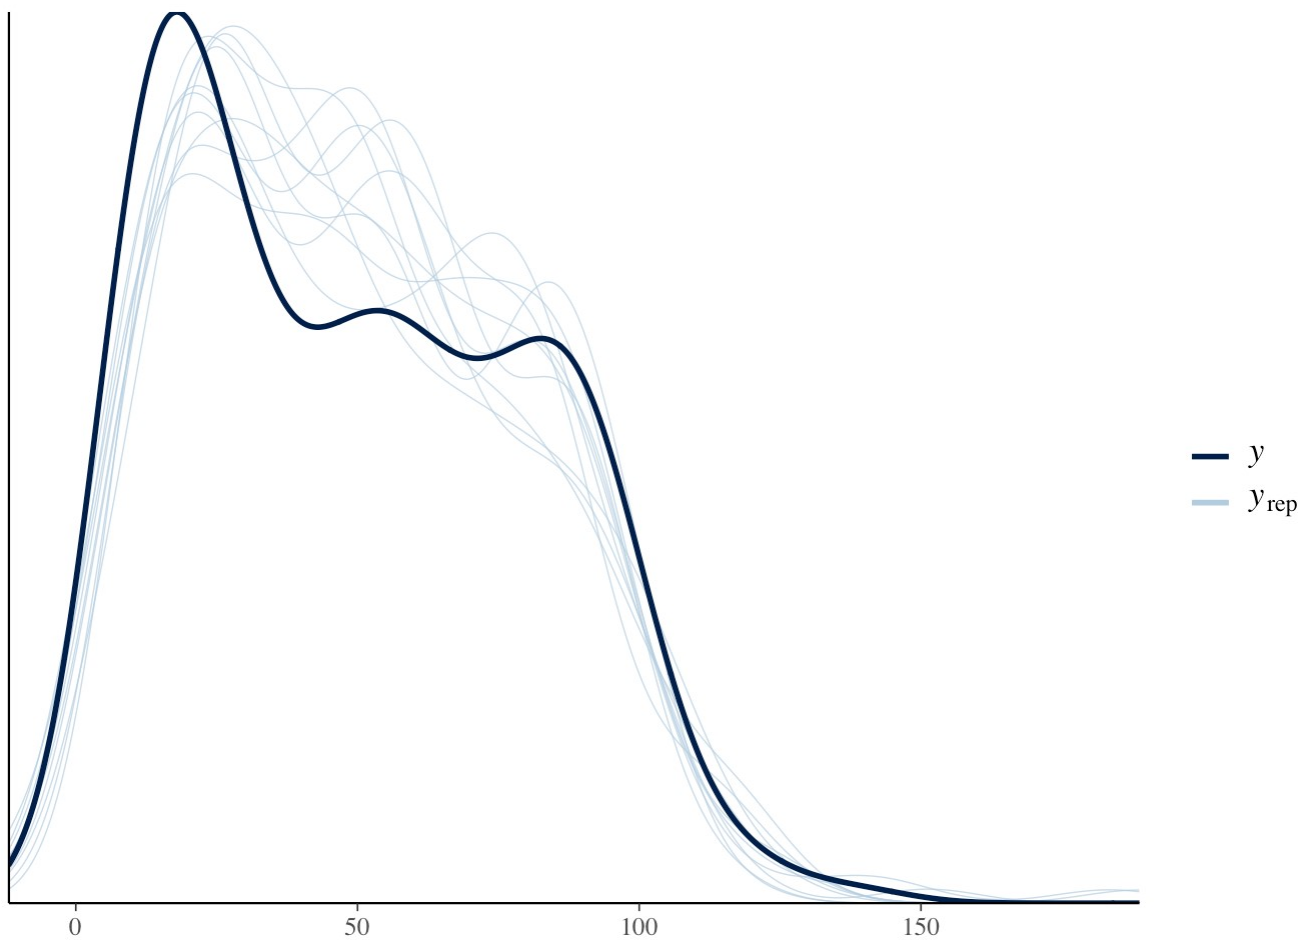

```
describe_posterior(bf_alphaFrontal_int_exgaussian_60s, test = "pd")
```

| Parameter<br><chr>                        | Median<br><dbl> | CI<br><dbl> | CI_low<br><dbl> | CI_high<br><dbl> |
|-------------------------------------------|-----------------|-------------|-----------------|------------------|
| 12 b_Intercept                            | 54.8962873      | 0.95        | 34.575703       | 106.3245         |
| 14 b_sigma_Intercept                      | 1.1361119       | 0.95        | -3.251961       | 1.9782           |
| 6 b_GroupStanding                         | -3.5349270      | 0.95        | -11.035264      | 5.3660           |
| 1 b_ConditionGreen_2                      | -4.3050589      | 0.95        | -7.663973       | -0.1997          |
| 2 b_ConditionIndoor_Crowded               | -3.1235770      | 0.95        | -6.696863       | 1.2939           |
| 3 b_ConditionIndoor_Uncrowded             | -4.2245386      | 0.95        | -8.553523       | 0.2500           |
| 4 b_ConditionOutdoor_Crowded              | -2.2266581      | 0.95        | -6.387896       | 2.8352           |
| 5 b_ConditionOutdoor_Uncrowded            | -2.1126586      | 0.95        | -5.549295       | 2.5657           |
| 7 b_GroupStanding:ConditionGreen_2        | -0.4992405      | 0.95        | -5.008784       | 3.9793           |
| 8 b_GroupStanding:ConditionIndoor_Crowded | -2.9352081      | 0.95        | -7.851290       | 2.2728           |

1-10 of 14 rows | 1-7 of 9 columns

Previous 1 2 Next

## 5 TBR (Theta/Beta Ratio)

```
hist(scale(eeg_markers_segments_60s$TBR))
```

**Histogram of scale(eeg\_markers\_segments\_60s\$TBR)**

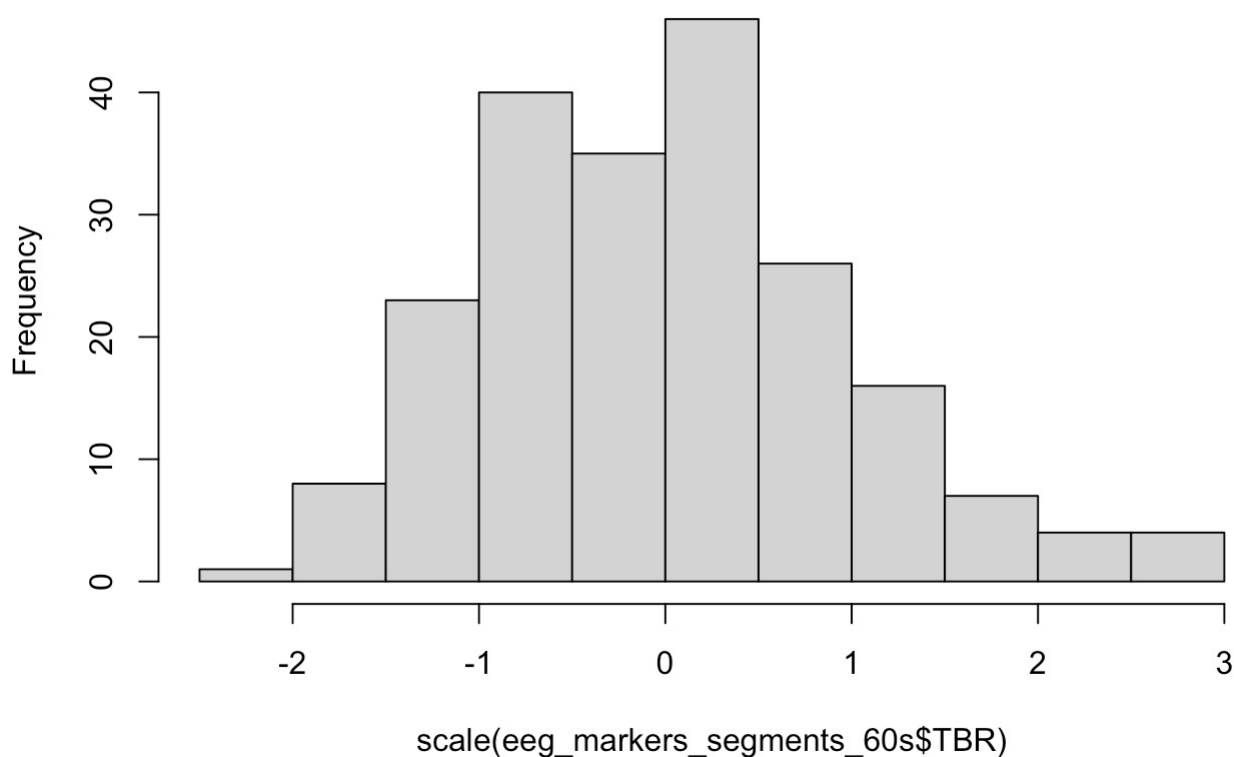

```
bf_tbr_int_student_60s <- brm(formula = bf(TBR ~ Group * Condition + (1 + Condition |  
Participant_ID) + (1|schedule), sigma~Group),  
    eeg_markers_segments_60s, #  
    family = student(),  
    iter = 4000,  
    seed = 4343,  
    cores = parallel::detectCores(),  
    prior = set_prior("normal(0,5)"),  
    save_pars = save_pars(all = T),  
    file = here::here("_brmsfiles/bf_tbr_int_student_60s"),  
    control = list(adapt_delta = .999)  
)  
pp_check(bf_tbr_int_student_60s)
```

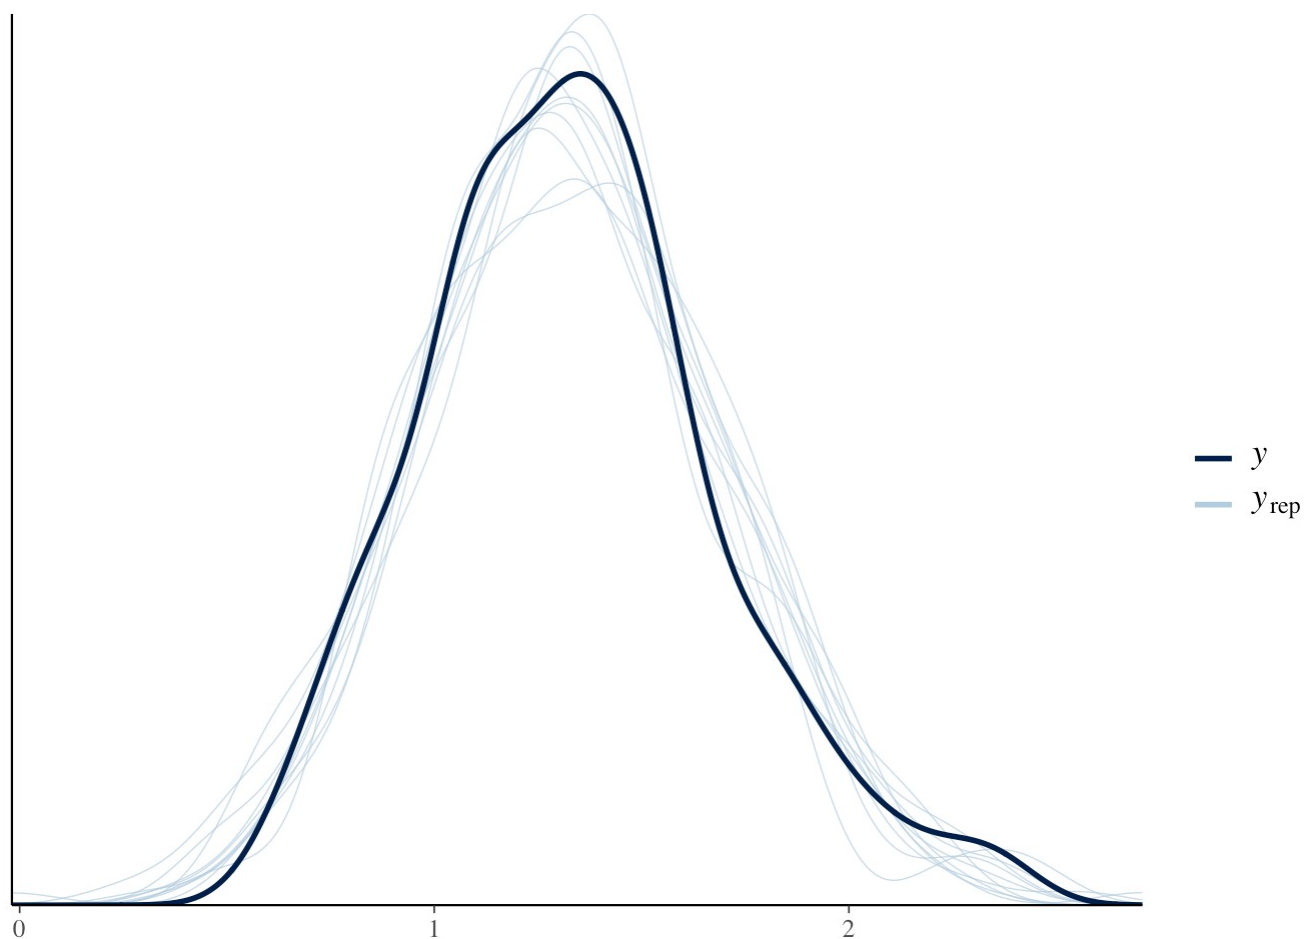

Posterior predictive check (pp\_check) looks good.

```
describe_posterior(bf_tbr_int_student_60s, test = "pd")
```

| Parameter<br><chr>                        | Median<br><dbl> | CI<br><dbl> | CI_low<br><dbl> | CI_high<br><dbl> |
|-------------------------------------------|-----------------|-------------|-----------------|------------------|
| 12 b_Intercept                            | 1.206759948     | 0.95        | -0.04775038     | 2.701760514      |
| 14 b_sigma_Intercept                      | -1.728935451    | 0.95        | -2.00638906     | -1.451481842     |
| 6 b_GroupStanding                         | 0.121913514     | 0.95        | -0.10951202     | 0.352339048      |
| 1 b_ConditionGreen_2                      | 0.138815634     | 0.95        | -0.00636794     | 0.284377802      |
| 2 b_ConditionIndoor_Crowded               | 0.169103658     | 0.95        | 0.02691680      | 0.311290496      |
| 3 b_ConditionIndoor_Uncrowded             | 0.035308337     | 0.95        | -0.09682176     | 0.167132818      |
| 4 b_ConditionOutdoor_Crowded              | 0.132285251     | 0.95        | -0.03008084     | 0.294646353      |
| 5 b_ConditionOutdoor_Uncrowded            | 0.061548917     | 0.95        | -0.07527257     | 0.212175737      |
| 7 b_GroupStanding:ConditionGreen_2        | -0.044037062    | 0.95        | -0.24664695     | 0.158572826      |
| 8 b_GroupStanding:ConditionIndoor_Crowded | 0.065625488     | 0.95        | -0.13175204     | 0.263003016      |

1-10 of 16 rows | 1-7 of 9 columns

Previous **1** 2 Next

## 6 FAA(Frontal Alpha Asymmetry)

```
hist(scale(eeg_markers_segments_60s$FAA))
```

**Histogram of scale(eeg\_markers\_segments\_60s\$FAA)**

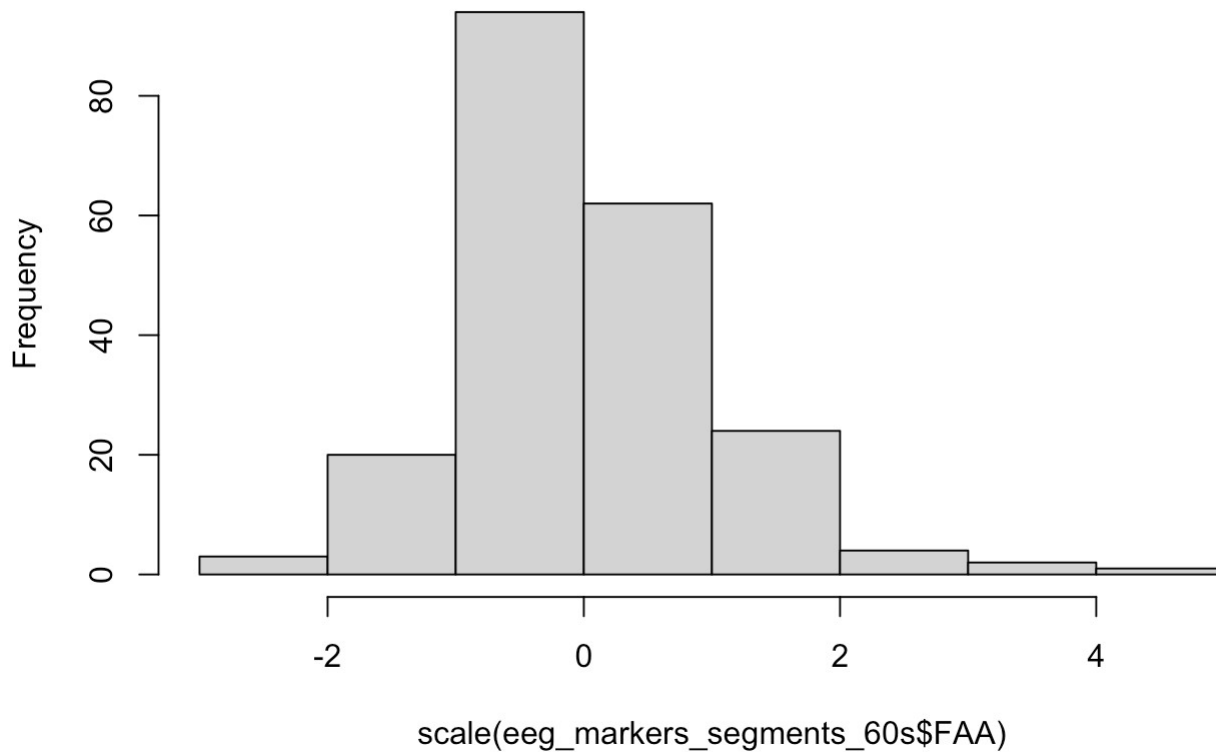

```
bf_faa_int_student_60s <- brm(formula = bf(FAA ~ Group*Condition + (1 + Condition | P
  participant_ID) + (1|schedule), sigma~Group),
  eeg_markers_segments_60s %>%
    mutate(FAAs = scale(FAA)) %>%
    filter(FAAs > -4 & FAAs < 4), # remove one outliers
  family = student(),
  iter = 4000,
  seed = 4343,

  prior = set_prior("normal(0,5)"),
  save_pars = save_pars(all = T),
  file = here::here("_brmsfiles/bf_faa_int_student_60s"),
  control = list(adapt_delta = .999, max_treedepth = 15)
)

pp_check(bf_faa_int_student_60s)
```

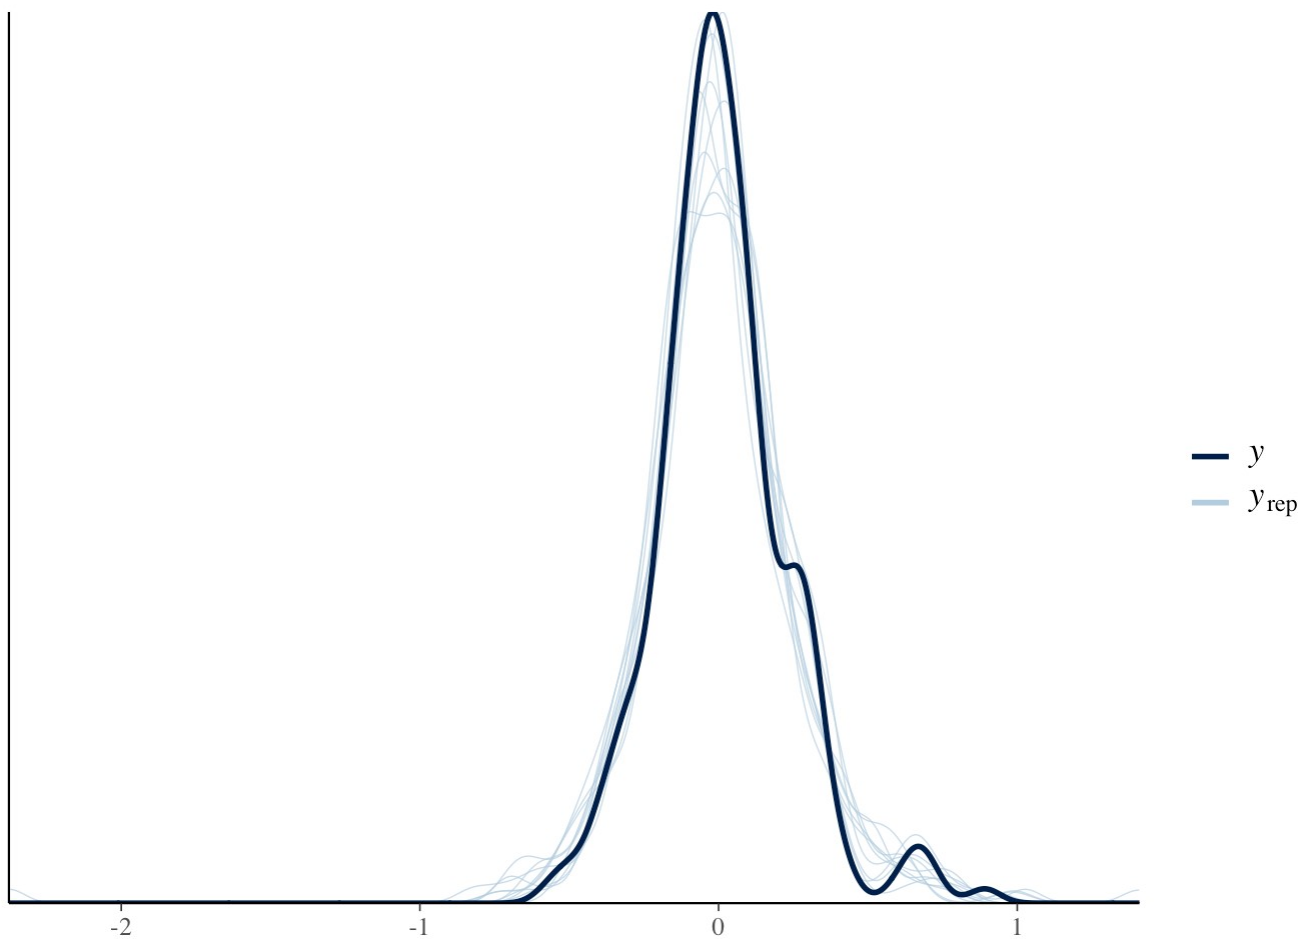

```
loo(bf_faa_int_student_60s)
```

```
##
## Computed from 8000 by 209 log-likelihood matrix
##
##      Estimate   SE
## elpd_loo    125.3 14.7
## p_loo       104.5  6.4
## looic       -250.7 29.3
## -----
## Monte Carlo SE of elpd_loo is NA.
##
## Pareto k diagnostic values:
##              Count Pct.   Min. n_eff
## (-Inf, 0.5] (good)   185  88.5%   346
## (0.5, 0.7]  (ok)     23  11.0%   172
## (0.7, 1]    (bad)     1   0.5%   101
## (1, Inf)    (very bad) 0   0.0%   <NA>
## See help('pareto-k-diagnostic') for details.
```

```
describe_posterior(bf_faa_int_student_60s, test = "pd")
```



| Parameter<br><chr>                        | Median<br><dbl> | CI<br><dbl> | CI_low<br><dbl> |      |
|-------------------------------------------|-----------------|-------------|-----------------|------|
| 12 b_Intercept                            | -0.009705545    | 0.95        | -1.30285562     | 1.14 |
| 14 b_sigma_Intercept                      | -2.686018659    | 0.95        | -3.13835381     | -2.3 |
| 6 b_GroupStanding                         | -0.033301563    | 0.95        | -0.16802697     | 0.10 |
| 1 b_ConditionGreen_2                      | 0.045792239     | 0.95        | -0.02908506     | 0.13 |
| 2 b_ConditionIndoor_Crowded               | 0.021916177     | 0.95        | -0.04616117     | 0.08 |
| 3 b_ConditionIndoor_Uncrowded             | 0.064062422     | 0.95        | -0.00103409     | 0.13 |
| 4 b_ConditionOutdoor_Crowded              | 0.095930683     | 0.95        | 0.03148369      | 0.16 |
| 5 b_ConditionOutdoor_Uncrowded            | 0.044471550     | 0.95        | -0.01905673     | 0.10 |
| 7 b_GroupStanding:ConditionGreen_2        | 0.049637412     | 0.95        | -0.07218256     | 0.17 |
| 8 b_GroupStanding:ConditionIndoor_Crowded | -0.026840298    | 0.95        | -0.12742683     | 0.08 |

1-10 of 16 rows | 1-7 of 9 columns

Previous **1** 2 Next

## EDA DATA

### Load data

```
eda_videobaseline_delta_60s <- readRDS("~/Nextcloud/VR_LAB_EDA_VAL/EDA_VALIDATION/analysis/_data/eda_video-baseline_delta_60s.rds")
eda_videobaseline_delta_60s
```

| Participant_ID<br><chr> | Group<br><chr> | Condition<br><chr> | d_Tonic_mean<br><dbl> | d_ISCR<br><dbl> | d_n...<br><dbl> | d_An    |
|-------------------------|----------------|--------------------|-----------------------|-----------------|-----------------|---------|
| 1302                    | Standing       | Green_1            | -1.102674619          | 4.84295623      | 0               | 1.1775  |
| 1302                    | Standing       | Indoor_Crowded     | -1.150777704          | -18.24476146    | -8              | -4.9857 |
| 1302                    | Standing       | Outdoor_Uncrowded  | -0.659167603          | 0.43181911      | -3              | -0.1257 |
| 1302                    | Standing       | Green_2            | -0.851794694          | 1.98848182      | 0               | -0.1615 |
| 1302                    | Standing       | Outdoor_Crowded    | -0.991517353          | -4.44801743     | -3              | -0.7240 |
| 1302                    | Standing       | Indoor_Uncrowded   | -1.079973445          | -8.46157806     | -7              | -1.9807 |
| 1370                    | Standing       | Indoor_Uncrowded   | -1.422206718          | -0.91470041     | 2               | -0.0560 |
| 1370                    | Standing       | Outdoor_Crowded    | -0.027549123          | 16.54284728     | 19              | 4.2775  |
| 1370                    | Standing       | Green_1            | -2.291949412          | -7.96299654     | -4              | -3.0652 |
| 1370                    | Standing       | Outdoor_Uncrowded  | -1.680977767          | 1.63054070      | 1               | 0.5337  |

1-10 of 192 rows | 1-7 of 8 columns

Previous 1 2 3 4 5 6 ... 20 Next

## 7 Tonic EDA

```
eda_videobaseline_delta_60s %>%  
  ggplot(aes(d_Tonic_mean, colour = Group)) +  
  geom_density(outline.type = "upper") +  
  facet_wrap(~Condition)
```

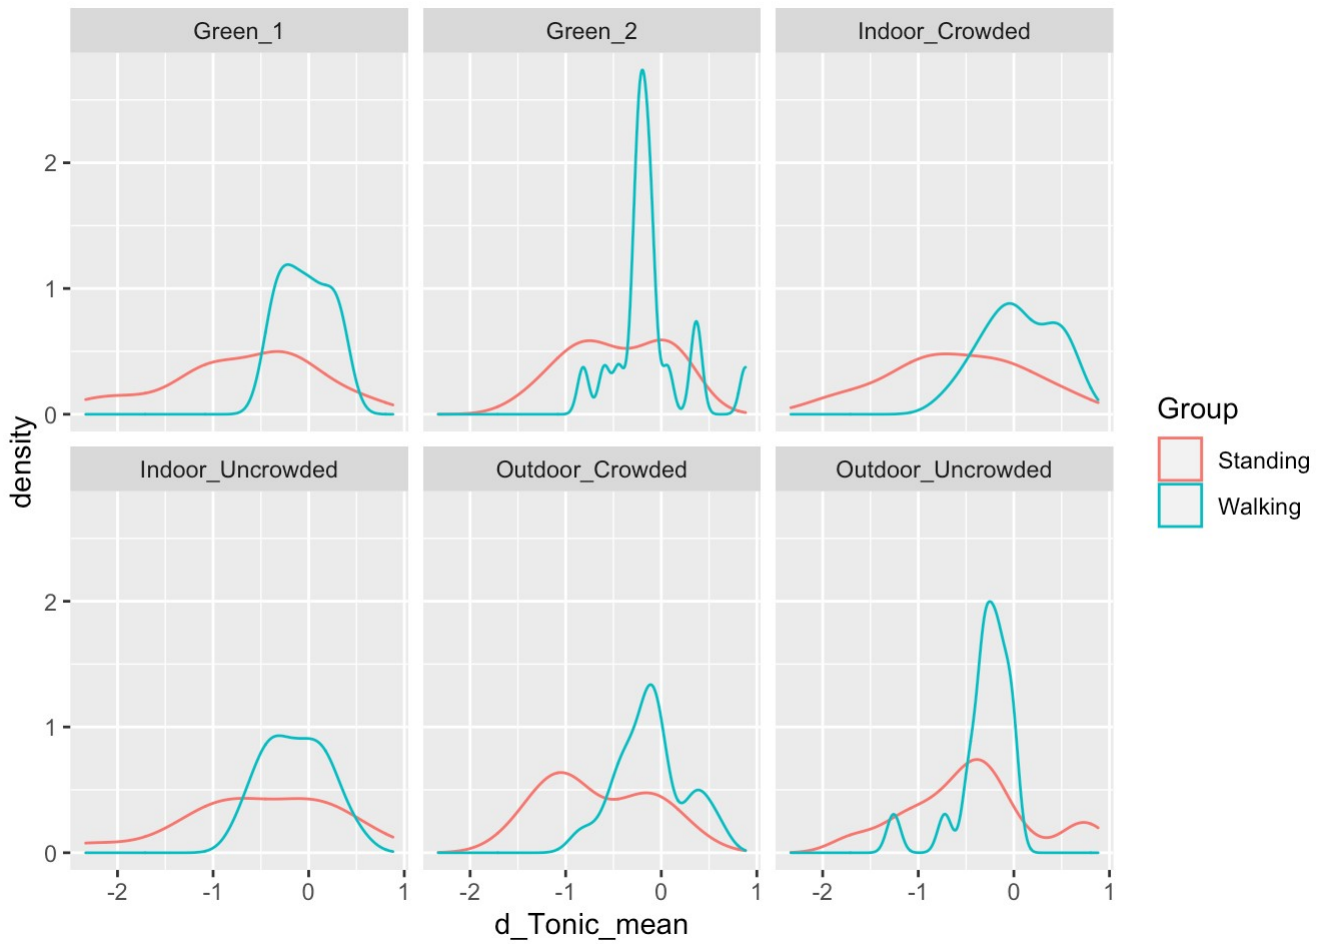

```
bf_tonic_int_student <- brm(bf(d_Tonic_mean ~ Group * Condition + (1 + Condition | Participant_ID) + (1 | schedule), sigma ~ Group),
  data = eda_videobaseline_delta_60s,
  family = student(),
  iter = 4000,
  seed = 4343,
  prior = set_prior("normal(0,10)"),
  save_pars = save_pars(all = T),
  file = here::here("_brmsfiles/bf_tonic_int_studen
t"),
  control = list(adapt_delta = .99, max_treedepth =
15)
)
pp_check(bf_tonic_int_student)
```

```
## Using 10 posterior draws for ppc type 'dens_overlay' by default.
```

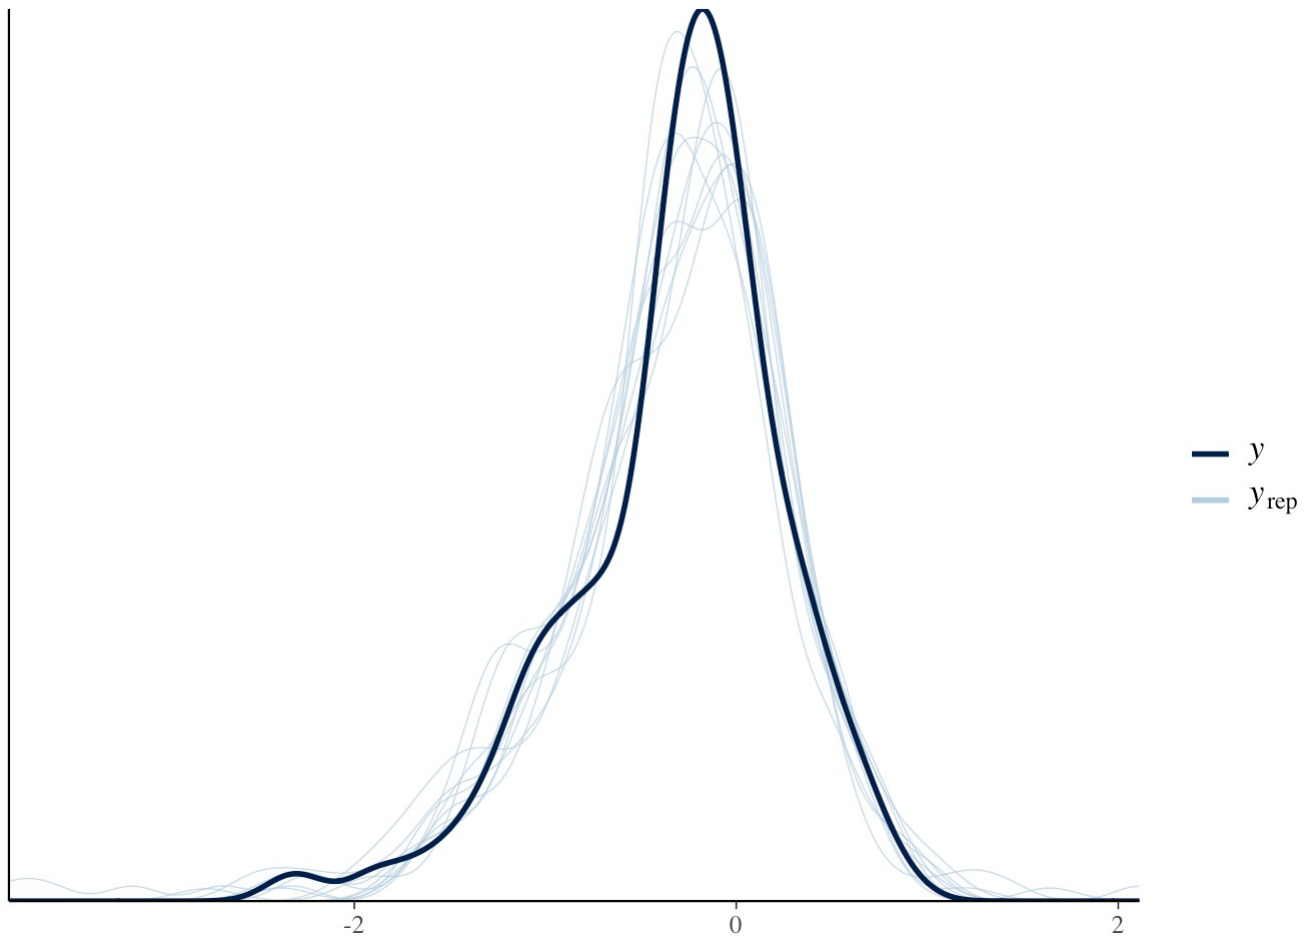

```
describe_posterior(bf_tonic_int_student, test = "pd")
```

**Parameter**  
<chr>

**Median** **CI**  
<dbl> <dbl>

**CI\_low**  
<dbl>

| Parameter<br><chr>                       | Median<br><dbl> | CI<br><dbl> | CI_low<br><dbl> | CI_high<br><dbl> |
|------------------------------------------|-----------------|-------------|-----------------|------------------|
| 12 b_Intercept                           | -0.6691144028   | 0.95        | -2.1801430      | 1.064            |
| 14 b_sigma_Intercept                     | -0.5922147406   | 0.95        | -0.9021014      | -0.339           |
| 6 b_GroupWalking                         | 0.6730286588    | 0.95        | 0.2934697       | 1.028            |
| 1 b_ConditionGreen_2                     | 0.2184769755    | 0.95        | -0.2353993      | 0.677            |
| 2 b_ConditionIndoor_Crowded              | 0.0659901474    | 0.95        | -0.3795858      | 0.540            |
| 3 b_ConditionIndoor_Uncrowded            | 0.1795261511    | 0.95        | -0.3038618      | 0.618            |
| 4 b_ConditionOutdoor_Crowded             | 0.0009971214    | 0.95        | -0.4315166      | 0.463            |
| 5 b_ConditionOutdoor_Uncrowded           | 0.1880749350    | 0.95        | -0.2322233      | 0.640            |
| 7 b_GroupWalking:ConditionGreen_2        | -0.3240237349   | 0.95        | -0.8300768      | 0.160            |
| 8 b_GroupWalking:ConditionIndoor_Crowded | 0.0354771751    | 0.95        | -0.4453340      | 0.550            |

1-10 of 16 rows | 1-7 of 9 columns

Previous **1** 2 Next

## 8 ISCR EDA

```
eda_videobaseline_delta_60s %>%
  mutate(d_ISCR_s = scale(d_ISCR)) %>%
  filter(d_ISCR_s > -4 & d_ISCR_s < 4) %>%
  ggplot(aes(d_ISCR, colour = Group)) +
  geom_density(outline.type = "upper") +
  facet_wrap(~Condition)
```

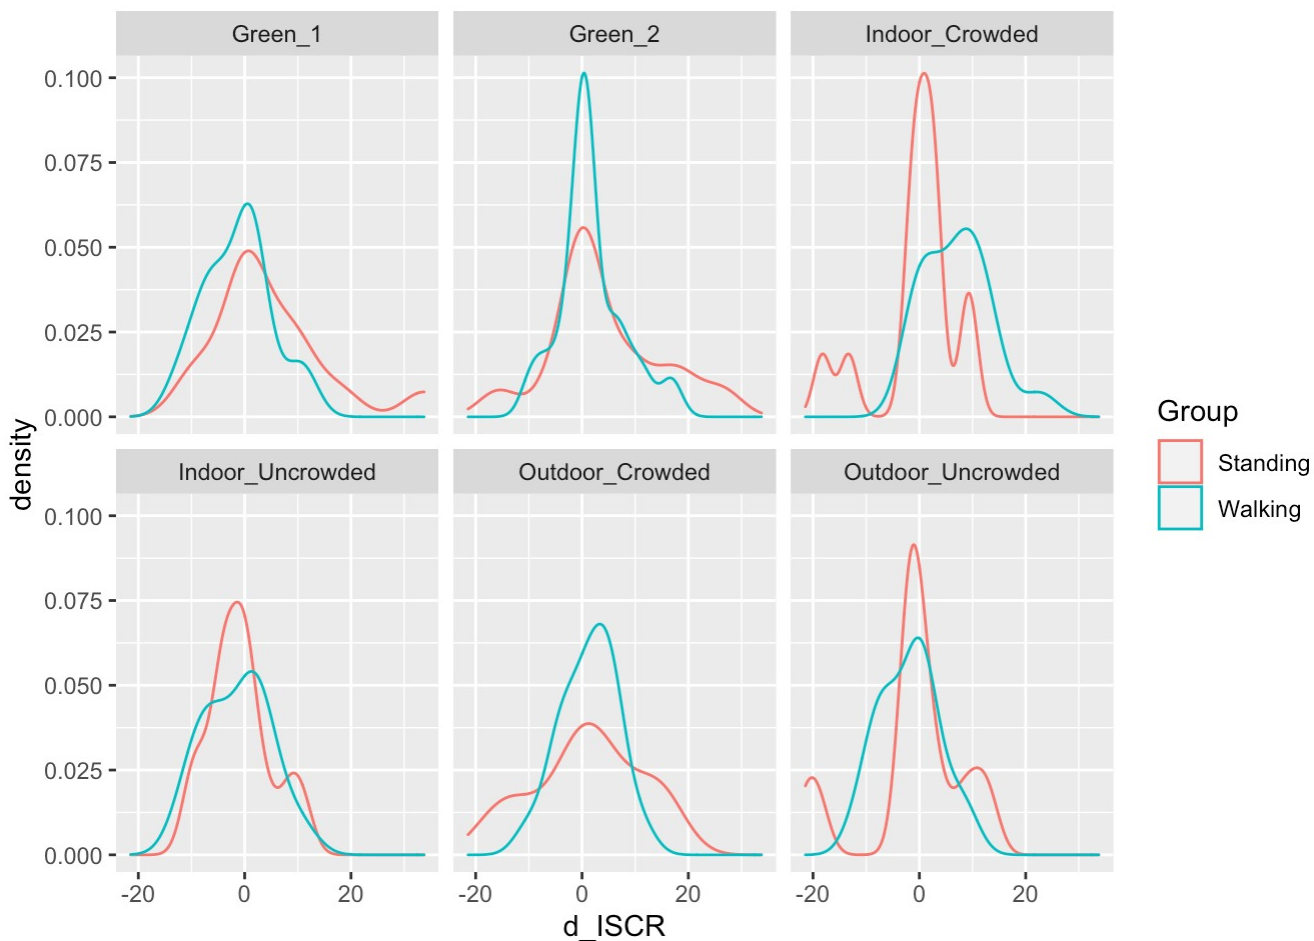

```
bf_iscr_int_student <- brm(bf(d_ISCR ~ Group * Condition + (1 + Condition|Participant
_ID) + (1|schedule), sigma ~ Group),
                           data = eda_videobaseline_delta_60s,
                           family = student(),
                           iter = 4000,
                           seed = 4343,
                           prior = set_prior("normal(0,10)"),
                           save_pars = save_pars(all = T),
                           file = here::here("_brmsfiles/bf_iscr_int_student"),
                           control = list(adapt_delta = .999)
                           )

pp_check(bf_iscr_int_student)
```

```
## Using 10 posterior draws for ppc type 'dens_overlay' by default.
```

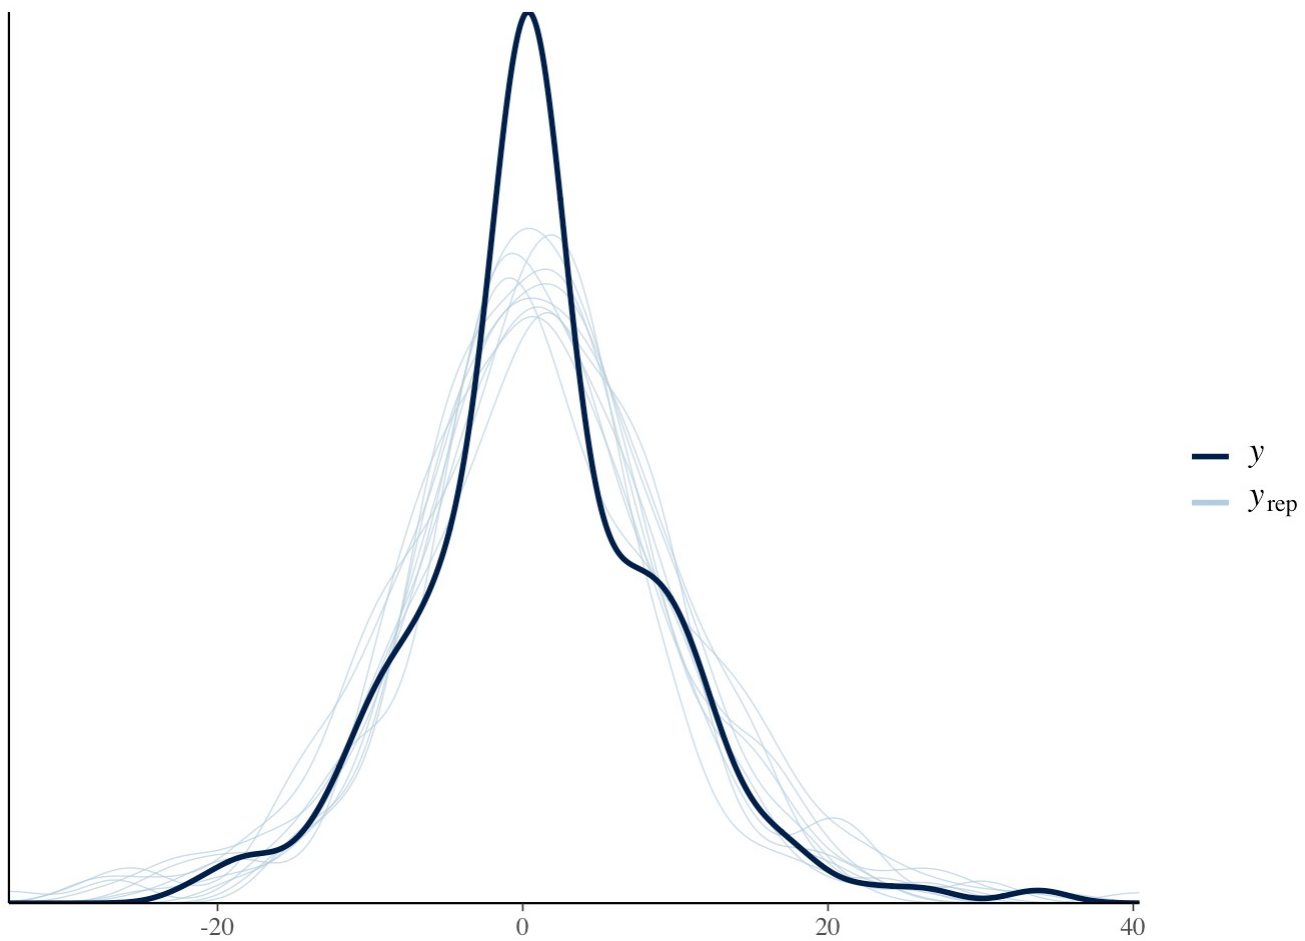

```
describe_posterior(bf_iscr_int_student, test = "pd")
```

| Parameter<br><chr>                       | Median<br><dbl> | CI<br><dbl> | CI_low<br><dbl> | CI_high<br><dbl> |
|------------------------------------------|-----------------|-------------|-----------------|------------------|
| 12 b_Intercept                           | 2.2452477       | 0.95        | -3.684022       | 8.2536973        |
| 14 b_sigma_Intercept                     | 2.1314965       | 0.95        | 1.912115        | 2.3282676        |
| 6 b_GroupWalking                         | -2.9013975      | 0.95        | -7.403174       | 1.8996067        |
| 1 b_ConditionGreen_2                     | 1.6433287       | 0.95        | -4.196037       | 7.4795432        |
| 2 b_ConditionIndoor_Crowded              | -1.7875911      | 0.95        | -7.446361       | 4.1094716        |
| 3 b_ConditionIndoor_Uncrowded            | -3.0325713      | 0.95        | -8.532996       | 2.8310099        |
| 4 b_ConditionOutdoor_Crowded             | -0.9687282      | 0.95        | -6.652783       | 4.9031908        |
| 5 b_ConditionOutdoor_Uncrowded           | -2.6303674      | 0.95        | -8.282850       | 3.1063347        |
| 7 b_GroupWalking:ConditionGreen_2        | 0.9172300       | 0.95        | -6.111678       | 7.0552508        |
| 8 b_GroupWalking:ConditionIndoor_Crowded | 9.5235418       | 0.95        | 2.805445        | 15.9890010       |

1-10 of 16 rows | 1-7 of 9 columns

Previous **1** 2 Next

# Session information

## R and packages used

```
sessionInfo()
```

```
## R version 4.1.1 (2021-08-10)
## Platform: x86_64-apple-darwin17.0 (64-bit)
## Running under: macOS Catalina 10.15.7
##
## Matrix products: default
## BLAS: /Library/Frameworks/R.framework/Versions/4.1/Resources/lib/libRblas.0.dylib
## LAPACK: /Library/Frameworks/R.framework/Versions/4.1/Resources/lib/libRlapack.dylib
##
## locale:
## [1] en_US.UTF-8/en_US.UTF-8/en_US.UTF-8/C/en_US.UTF-8/en_US.UTF-8
##
## attached base packages:
## [1] stats graphics grDevices utils datasets methods base
##
## other attached packages:
## [1] bayestestR_0.11.0 patchwork_1.1.1 brms_2.16.2 Rcpp_1.0.7
## [5] forcats_0.5.1 stringr_1.4.0 dplyr_1.0.7 purrr_0.3.4
## [9] readr_2.0.1 tidyr_1.1.3 tibble_3.1.5 ggplot2_3.3.5
## [13] tidyverse_1.3.1
##
## loaded via a namespace (and not attached):
## [1] readxl_1.3.1 backports_1.2.1 plyr_1.8.6
## [4] igraph_1.2.6 splines_4.1.1 crosstalk_1.1.1
## [7] rstantools_2.1.1 inline_0.3.19 digest_0.6.28
## [10] htmltools_0.5.2 rsconnect_0.8.24 fansi_0.5.0
## [13] magrittr_2.0.1 checkmate_2.0.0 tzdb_0.1.2
## [16] modelr_0.1.8 RcppParallel_5.1.4 matrixStats_0.61.0
## [19] vroom_1.5.4 xts_0.12.1 prettyunits_1.1.1
## [22] colorspace_2.0-2 rvest_1.0.1 haven_2.4.3
## [25] xfun_0.26 callr_3.7.0 crayon_1.4.1
## [28] jsonlite_1.7.2 lme4_1.1-27.1 survival_3.2-11
## [31] zoo_1.8-9 glue_1.4.2 gtable_0.3.0
## [34] emmeans_1.7.0 V8_3.4.2 distributional_0.2.2
## [37] pkgbuild_1.2.0 rstan_2.26.3 abind_1.4-5
## [40] scales_1.1.1 mvtnorm_1.1-3 DBI_1.1.1
## [43] miniUI_0.1.1.1 xtable_1.8-4 bit_4.0.4
## [46] stats4_4.1.1 StanHeaders_2.26.3 DT_0.19
## [49] datawizard_0.2.0 htmlwidgets_1.5.4 httr_1.4.2
## [52] threejs_0.3.3 posterior_1.1.0 ellipsis_0.3.2
## [55] pkgconfig_2.0.3 loo_2.4.1 farver_2.1.0
## [58] sass_0.4.0 dbplyr_2.1.1 here_1.0.1
## [61] utf8_1.2.2 labeling_0.4.2 tidyselect_1.1.1
## [64] rlang_0.4.11 reshape2_1.4.4 later_1.3.0
## [67] munsell_0.5.0 cellranger_1.1.0 tools_4.1.1
## [70] cli_3.0.1 generics_0.1.0 broom_0.7.9
## [73] ggridges_0.5.3 evaluate_0.14 fastmap_1.1.0
## [76] yaml_2.2.1 bit64_4.0.5 processx_3.5.2
## [79] knitr_1.33 fs_1.5.0 nlme_3.1-152
## [82] mime_0.12 projpred_2.0.2 rstanarm_2.21.1
```



```
## [85] xml2_1.3.2          compiler_4.1.1      bayesplot_1.8.1
## [88] shinythemes_1.2.0    rstudioapi_0.13    curl_4.3.2
## [91] gamm4_0.2-6          reprex_2.0.1        bslib_0.3.1
## [94] stringi_1.7.5        highr_0.9           ps_1.6.0
## [97] Brodningnag_1.2-6    lattice_0.20-44     Matrix_1.3-4
## [100] nloptr_1.2.2.2       markdown_1.1        shinyjs_2.0.0
## [103] tensorA_0.36.2       vctrs_0.3.8         pillar_1.6.3
## [106] lifecycle_1.0.1      jquerylib_0.1.4     bridgesampling_1.1-2
## [109] estimability_1.3     insight_0.14.3      httpuv_1.6.3
## [112] R6_2.5.1             promises_1.2.0.1    gridExtra_2.3
## [115] codetools_0.2-18     boot_1.3-28         colourpicker_1.1.1
## [118] MASS_7.3-54          gtools_3.9.2        assertthat_0.2.1
## [121] rprojroot_2.0.2      withr_2.4.2         shinystan_2.5.0
## [124] mgcv_1.8-36          parallel_4.1.1      hms_1.1.0
## [127] grid_4.1.1           coda_0.19-4         minqa_1.2.4
## [130] rmarkdown_2.10       shiny_1.7.1         lubridate_1.7.10
## [133] base64enc_0.1-3      dygraphs_1.1.1.6
```
